# Supplementary material for: Direct synthesis of high-silica nano ZSM-5 aggregates with controllable mesoporosity and enhanced catalytic properties
Source: Royal Society of Chemistry journal article supplement (doi:10.1039/c6ra21080e), 2016-01-01
Supplement: c6ra21080e1.pdf [file c6ra21080e1.pdf]

## Supporting Information for

# Direct synthesis of high-silica nano ZSM-5 aggregates with controllable mesoporosity and its enhanced catalytic properties

Hongyao Li, Yaquan Wang,\* Fanjun Meng, Hengbao Chen, Chao Sun, Shuhai Wang

School of Chemical Engineering and Technology, Tianjin University, Tianjin 300072, China.

Fax: +86-22-23507881; Tel: +86-22-23507881; E-mail: yqwang@tju.edu.cn

### Table of Contents

|                                  |           |
|----------------------------------|-----------|
| <b>Tables.....</b>               | <b>S2</b> |
| <b>Figures .....</b>             | <b>S2</b> |
| <b>Results .....</b>             | <b>S2</b> |
| <b>Notes and references.....</b> | <b>S2</b> |

## 1. Tables

**Table S1** The  $\text{SiO}_2/\text{Al}_2\text{O}_3$  and solid yields of NA-X, C-ZSM-5 and  $\text{C}_1$ -ZSM-5 samples.

| samples             | $\text{SiO}_2/\text{Al}_2\text{O}_3^a$ | Solid yields (%) |
|---------------------|----------------------------------------|------------------|
| NA-1                | 163                                    | 76.78            |
| NA-2                | 159                                    | 72.59            |
| NA-3                | 151                                    | 68.17            |
| NA-4                | 147                                    | 59.37            |
| C-ZSM-5             | 134                                    | *                |
| $\text{C}_1$ -ZSM-5 | 172                                    | *                |

a  $\text{SiO}_2/\text{Al}_2\text{O}_3$  molar ratio of the synthesized NA-X, C-ZSM-5 and  $\text{C}_1$ -ZSM-5 zeolites determined by ICP analysis.

## 2. Figures

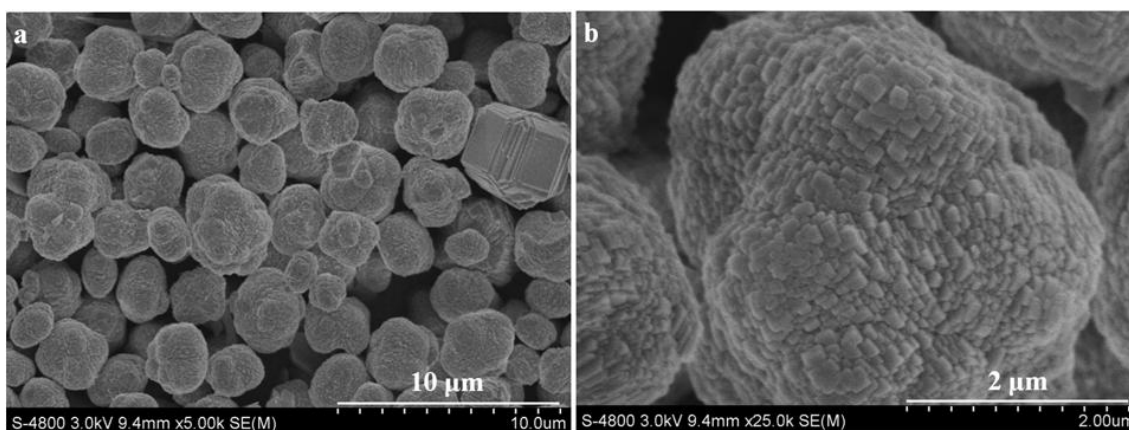

**Fig. S1** SEM images for C-ZSM-5 zeolite (a) low magnification, (b) high magnification.

## 3. Results

### 3.1 Inductively-coupled plasma (ICP) analysis of synthesized samples

The total silica and aluminum contents in the synthesized samples (NA-X and C-ZSM-5) and the reference material  $\text{C}_1$ -ZSM-5 were determined by ICP analysis (Table S1, ESI). The  $\text{SiO}_2/\text{Al}_2\text{O}_3$  ratios of NA-X(1-4)) and C-ZSM-5 samples were about 163, 159, 151, 147, 134, 172 when a batch  $\text{SiO}_2/\text{Al}_2\text{O}_3$  ratio of 168 was used, which are slightly lower than the theoretical values in the preparative gels. This may be because of the lower availability of silica than alumina in the alkaline medium during their synthesis.<sup>1</sup> The  $\text{SiO}_2/\text{Al}_2\text{O}_3$  ratio of  $\text{C}_1$ -ZSM-5 (172) was higher than the nominal ratio in the starting material (167), which indicates that the Si atoms in synthetic solutions were easier to incorporate into the framework structures of the  $\text{C}_1$ -ZSM-5 zeolite than Al atoms in its hydrothermal synthesis.

## Notes and references

- 1 T. Xue, Y. M. Wang, M.-Y. He, *Solid State Sci.*, 2012, 14, 409–418.
